# Supplementary material for: Reversible structural phase transitions and switchable dielectric behaviours in a cyanometallate-based double perovskite-type cage compound: [C3H4NS]2[KCo(CN)6]
Source: Royal Society of Chemistry journal article supplement (doi:10.1039/c9qm00724e), 2020-01-01
Supplement: c9qm00724e1.pdf [file c9qm00724e1.pdf]

### Supporting Information

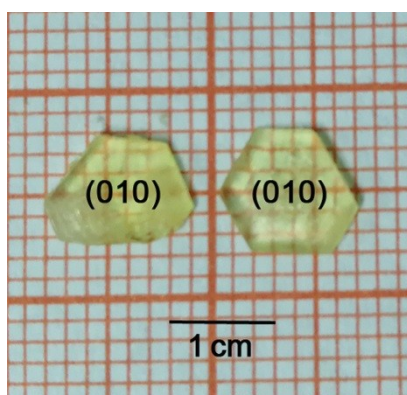

Figure S1. Crystal morphology of **1**.

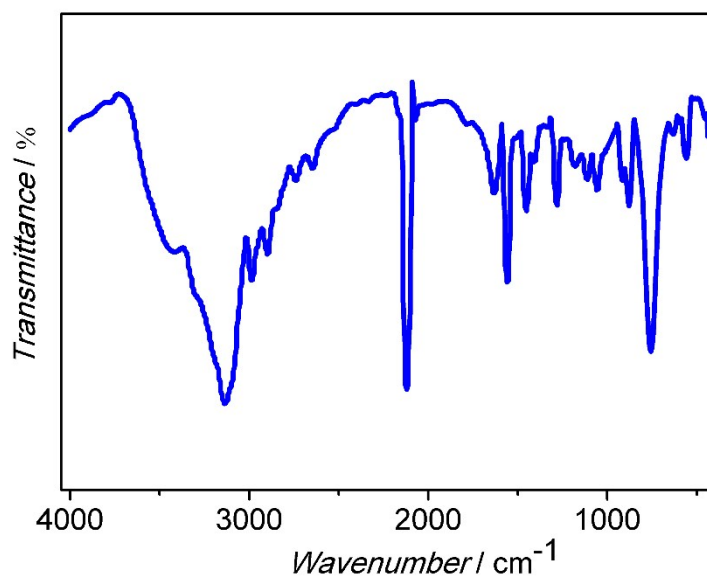

Figure S2. IR spectrum of **1** measured at 293 K.

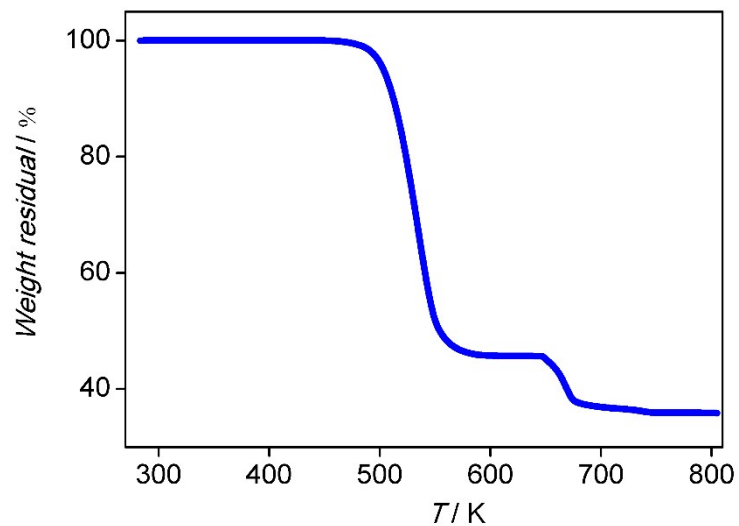

Figure S3. TGA curves of **1**.

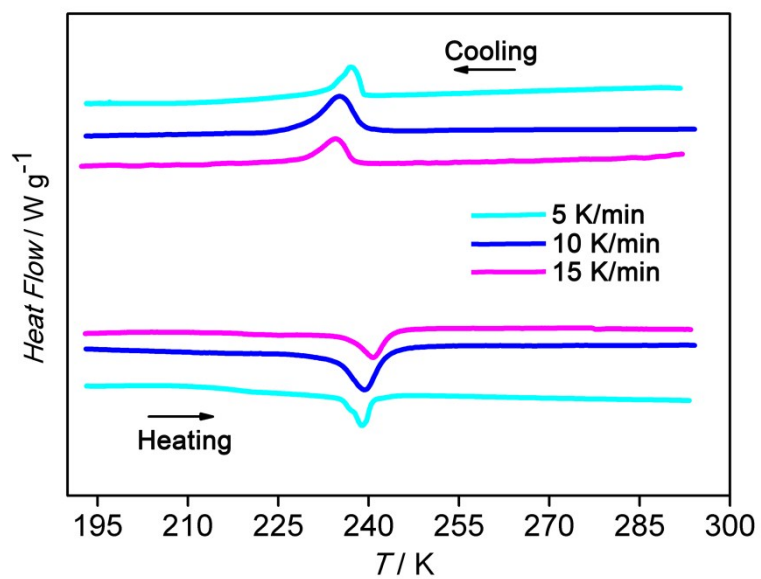

Figure S4. Characterizations of the phase transition behaviours. DSC curves of **1** measured at different scanning rates.

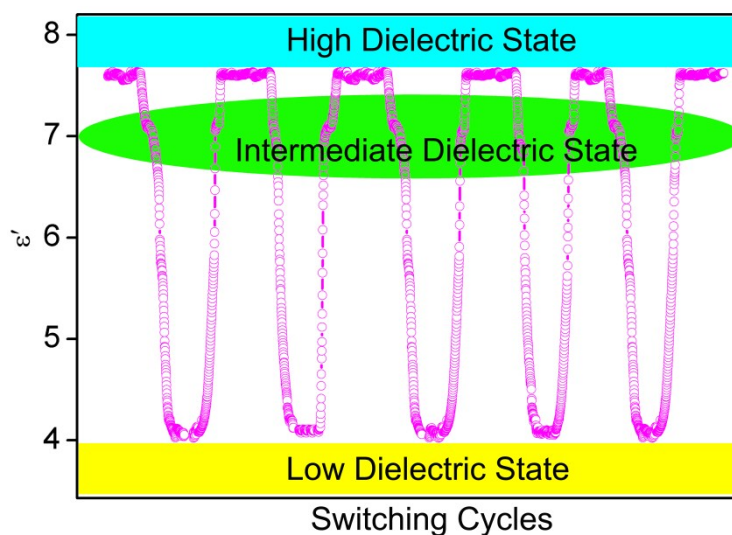

Figure S5. The  $\epsilon'$ -switching cycles of dielectric response of **1** at 1000 kHz.

**Table S1.** Crystallographic data and structure refinements for **1** at ITP (220 K) and HTP (293 K).

|                                                                                                           | <b>1</b>                                                        |                                                                 |
|-----------------------------------------------------------------------------------------------------------|-----------------------------------------------------------------|-----------------------------------------------------------------|
|                                                                                                           | ITP                                                             | HTP                                                             |
| <i>T</i> / K                                                                                              | ITP                                                             | HTP                                                             |
| Formula                                                                                                   | C <sub>12</sub> H <sub>8</sub> CoN <sub>8</sub> KS <sub>2</sub> | C <sub>12</sub> H <sub>8</sub> CoN <sub>8</sub> KS <sub>2</sub> |
| Formula weight                                                                                            | 426.37                                                          | 426.37                                                          |
| Crystal system                                                                                            | orthorhombic                                                    | orthorhombic                                                    |
| Space group                                                                                               | <i>Cmcm</i>                                                     | <i>Cmcm</i>                                                     |
| <i>a</i> / Å                                                                                              | 9.1037(18)                                                      | 9.0903(18)                                                      |
| <i>b</i> / Å                                                                                              | 16.085(3)                                                       | 16.188(3)                                                       |
| <i>c</i> / Å                                                                                              | 11.716(2)                                                       | 11.776(2)                                                       |
| <i>V</i> / Å <sup>3</sup>                                                                                 | 1715.6(6)                                                       | 1732.9(6)                                                       |
| <i>Z</i>                                                                                                  | 4                                                               | 4                                                               |
| <i>D</i> <sub>calc</sub> / g·cm <sup>-3</sup>                                                             | 1.302                                                           | 1.289                                                           |
| $\mu$ / mm <sup>-1</sup>                                                                                  | 1.360                                                           | 1.346                                                           |
| Reflections collected unique                                                                              | 5739                                                            | 6133                                                            |
| <i>R</i> <sub>int</sub>                                                                                   | 0.0979                                                          | 0.0236                                                          |
| <i>R</i> <sub>1</sub> <sup>[a]</sup> , <i>wR</i> <sub>2</sub> <sup>[b]</sup> [ <i>I</i> > 2σ( <i>I</i> )] | 0.1523, 0.4403                                                  | 0.1099, 0.3473                                                  |
| <i>R</i> <sub>1</sub> , <i>wR</i> <sub>2</sub> [all data]                                                 | 0.1610, 0.4572                                                  | 0.1131, 0.3558                                                  |
| GOF                                                                                                       | 1.985                                                           | 1.726                                                           |
| $\Delta\rho$ <sup>[c]</sup> / e·Å <sup>-3</sup>                                                           | 3.415 / -1.235                                                  | 3.404 / -0.418                                                  |

[a]  $R_1 = \Sigma ||F_o| - |F_c|| / \Sigma |F_o|$ . [b]  $wR_2 = [\Sigma w(F_o^2 - F_c^2)^2] / \Sigma w(F_o^2)^2]^{1/2}$ . [c] Maximum and minimum residual electron density.

**Table S2.** Bonds lengths (Å) and angles (°) for **1** at ITP (220 K) and HTP (293 K).

---

| <b>1</b> (220 K) |           |              |           |
|------------------|-----------|--------------|-----------|
| Co1–C1           | 1.884(10) | N1–K1–N1#5   | 176.1(4)  |
| Co1–C1#4         | 1.884(10) | N1–K1–N2#1   | 91.41(16) |
| Co1–C2           | 1.873(11) | N1–K1–N2#8   | 91.41(16) |
| Co1–C2#3         | 1.873(11) | N1#5–K1–N2#1 | 91.41(16) |
| Co1–C3           | 1.915(9)  | N1#5–K1–N2#8 | 91.41(16) |
| Co1–C3#3         | 1.915(9)  | N1–K1–N3#6   | 88.83(13) |
| K1–N1            | 2.822(9)  | N1–K1–N3#7   | 88.83(13) |
| K1–N1#5          | 2.822(9)  | N1#5–K1–N3#6 | 88.83(13) |
| K1–N2#1          | 2.940(12) | N1#5–K1–N3#7 | 88.83(13) |
| K1–N2#8          | 2.940(12) | N2#1–K1–N2#8 | 88.5(5)   |
| K1#1–N2          | 2.940(12) | N2#1–K1–N3#6 | 82.3(3)   |
| K1–N3#6          | 2.841(9)  | N2#1–K1–N3#7 | 170.8(4)  |
| K1–N3#7          | 2.841(9)  | N2#8–K1–N3#6 | 170.8(4)  |
| K1#7–N3          | 2.841(9)  | N2#8–K1–N3#7 | 82.3(3)   |
|                  |           | N3#6–K1–N3#7 | 106.9(4)  |

Symmetry codes: #1  $-x, 1-y, 1-z$ ; #2  $-x, y, z$ ; #3  $-x, y, 1/2-z$ ; #4  $x, y, 1/2-z$ ; #5  $x, y, 3/2-z$ ; #6  $-1/2+x, 1/2-y, 1/2+z$ ; #7  $1/2-x, 1/2-y, 1-z$ ; #8  $x, 1-y, 1/2+z$ .

---

| <b>1</b> (293 K) |          |              |           |
|------------------|----------|--------------|-----------|
| Co1–C1           | 1.901(7) | N1–K1–N1#5   | 178.1(2)  |
| Co1–C1#4         | 1.901(7) | N1–K1–N2#1   | 90.69(9)  |
| Co1–C2           | 1.894(6) | N1–K1–N2#8   | 90.69(9)  |
| Co1–C2#3         | 1.894(6) | N1#5–K1–N2#1 | 90.69(9)  |
| Co1–C3           | 1.896(6) | N1#5–K1–N2#8 | 90.69(9)  |
| Co1–C3#3         | 1.896(6) | N1–K1–N3#6   | 89.42(7)  |
| K1–N1#5          | 2.858(6) | N1–K1–N3#7   | 89.42(7)  |
| K1–N2#1          | 2.997(8) | N1#5–K1–N3#6 | 89.42(7)  |
| K1–N2#8          | 2.997(8) | N1#5–K1–N3#7 | 89.42(7)  |
| K1#1–N2          | 2.997(8) | N2#1–K1–N2#8 | 89.1(3)   |
| K1–N3#6          | 2.871(5) | N2#1–K1–N3#6 | 82.23(17) |
| K1–N3#7          | 2.871(5) | N2#1–K1–N3#7 | 171.3(2)  |
| K1#7–N3          | 2.872(5) | N2#8–K1–N3#6 | 171.3(2)  |
|                  |          | N2#8–K1–N3#7 | 82.23(17) |
|                  |          | N3#6–K1–N3#7 | 106.5(3)  |

Symmetry codes: #1  $-x, 1-y, 1-z$ ; #2  $-x, y, z$ ; #3  $-x, y, 1/2-z$ ; #4  $x, y, 1/2-z$ ; #5  $x, y, 3/2-z$ ; #6  $-1/2+x, 1/2-y, 1/2+z$ ; #7  $1/2-x, 1/2-y, 1-z$ ; #8  $x, 1-y, 1/2+z$ .

---
